# Supplementary material for: Optimizing the treatment mode for de novo metastatic nasopharyngeal carcinoma with bone-only metastasis
Source: PubMed Central journal article supplement (PMC8729074; doi:10.1186/s12885-021-09152-1), 2022-01-04
Supplement: 12885_2021_9152_MOESM1_ESM.pdf [file 12885_2021_9152_MOESM1_ESM.pdf]

# Supplementary Figure S1

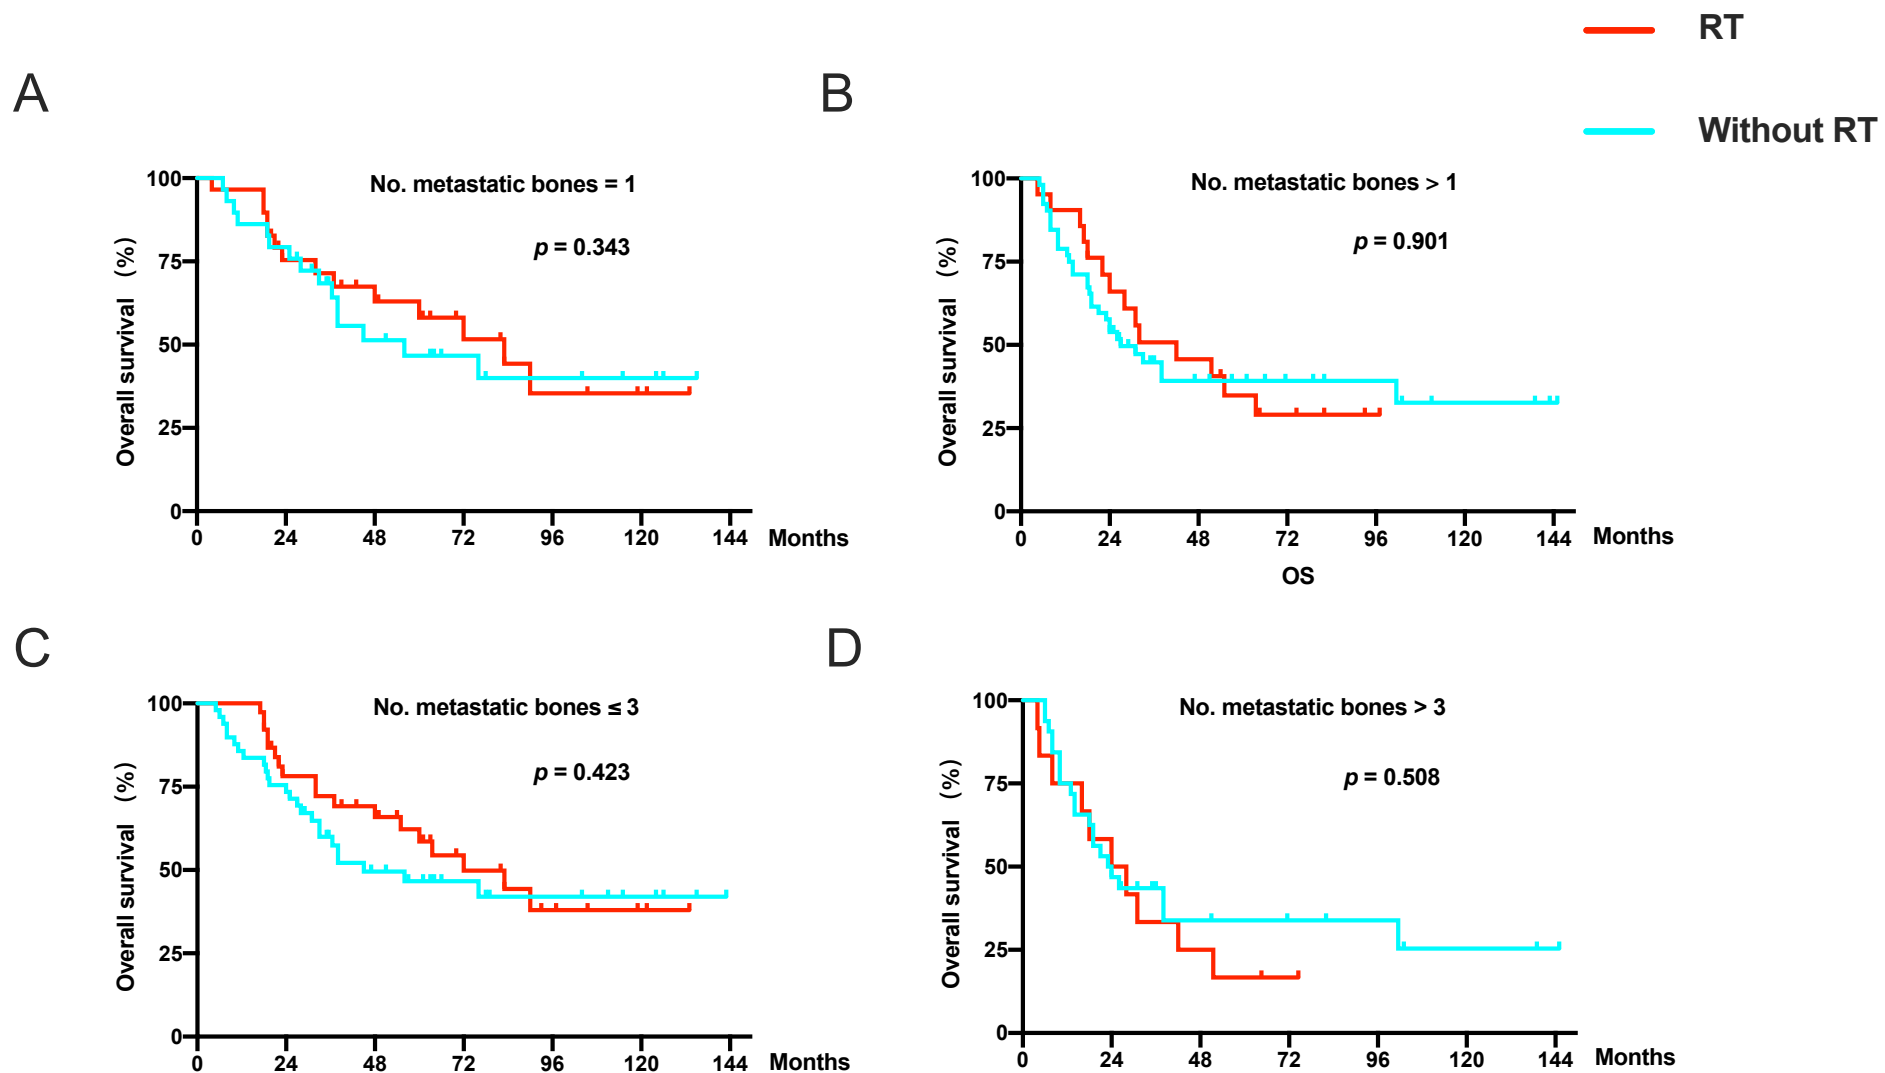

**Fig. S1** Kaplan-Meier curves for OS of 131 patients with de novo metastatic NPC based on whether patients received RT to metastatic bone lesions or not that was divided by the cut-off values of 1 (a and b) and 3 bone metastases (c and d).
